# Supplementary material for: Risk Assessment and Determination of Heavy Metals in Home Meal Replacement Products by Using Inductively Coupled Plasma Mass Spectrometry and Direct Mercury Analyzer
Source: Foods. 2022 Feb 10;11(4):504. doi: 10.3390/foods11040504 (PMC8870816; doi:10.3390/foods11040504)
Supplement: Supplementary file 1 [file foods-11-00504-s001.zip]

Archive with 5 entries (5 files):
- Table S1 (revised).pdf
- Table S2 (revised).pdf
- Table S3 (revised).pdf
- Table S4.pdf
- Table S5.pdf
