# Supplementary material for: Risk Assessment and Determination of Heavy Metals in Home Meal Replacement Products by Using Inductively Coupled Plasma Mass Spectrometry and Direct Mercury Analyzer
Source: Foods. 2022 Feb 10;11(4):504. doi: 10.3390/foods11040504 (PMC8870816; doi:10.3390/foods11040504)
Supplement: Supplementary file 1 [file foods-11-00504-s001.zip › Table S1 (revised).pdf]

**Table S1. Recovery of the six heavy metals.**

| Matrix type            | Heavy metal element | Recovery (%) <sup>a</sup> |             |              |
|------------------------|---------------------|---------------------------|-------------|--------------|
| Non-fatty solid phase  | Pb (mg/kg)          | 98.96±0.53                | 97.29±1.03  | 95.21±2.14   |
|                        | Cd (mg/kg)          | 89.06±2.20                | 91.02±2.04  | 90.96±5.37   |
|                        | As (mg/kg)          | 99.01±5.46                | 101.82±1.11 | 103.56±8.50  |
|                        | Sn (mg/kg)          | 104.23±0.53               | 109.78±8.43 | 111.97±14.78 |
|                        | Hg (µg/kg)          | 115.65±4.04               | 118.02±3.31 | 112.02±5.82  |
|                        | Me-Hg (µg/kg)       | 80.97±3.12                | 85.06±4.62  | 94.56±4.25   |
| Fatty solid phase      | Pb (mg/kg)          | 97.86±4.20                | 90.34±1.05  | 80.65±0.65   |
|                        | Cd (mg/kg)          | 83.23±2.10                | 85.67±9.45  | 90.78±6.65   |
|                        | As (mg/kg)          | 99.02±0.54                | 101.23±1.04 | 104.65±2.15  |
|                        | Sn (mg/kg)          | 107.98±5.38               | 111.92±2.03 | 114.86±2.19  |
|                        | Hg (µg/kg)          | 116.78±8.49               | 112.65±1.10 | 104.65±5.45  |
|                        | Me-Hg (µg/kg)       | 102.23±14.68              | 113.23±8.42 | 119.87±0.52  |
| Non-fatty liquid phase | Pb (mg/kg)          | 83.06±5.83                | 85.87±3.30  | 89.06±4.03   |
|                        | Cd (mg/kg)          | 84.02±4.21                | 90.34±4.61  | 94.54±3.11   |
|                        | As (mg/kg)          | 100.29±2.06               | 105.76±5.76 | 108.87±9.04  |
|                        | Sn (mg/kg)          | 110.64±1.23               | 115.23±1.46 | 116.76±2.97  |
|                        | Hg (µg/kg)          | 112.54±7.05               | 99.07±8.52  | 93.65±6.13   |
|                        | Me-Hg (µg/kg)       | 93.02±3.07                | 99.78±1.20  | 103.45±2.85  |
| Fatty liquid phase     | Pb (mg/kg)          | 94.02±4.56                | 108.96±5.02 | 103.23±0.76  |
|                        | Cd (mg/kg)          | 100.29±10.26              | 98.76±13.91 | 87.56±4.56   |
|                        | As (mg/kg)          | 101.87±7.84               | 104.72±8.21 | 112.96±5.23  |
|                        | Sn (mg/kg)          | 114.79±2.67               | 118.02±5.01 | 105.02±0.87  |
|                        | Hg (µg/kg)          | 95.47±7.41                | 89.76±4.03  | 90.78±1.78   |
|                        | Me-Hg (µg/kg)       | 92.87±3.51                | 84.01±5.40  | 88.93±4.30   |

<sup>a</sup>Recovery was evaluated with 0.25, 1.0, 10.0 mg/kg for Pb, Cd, As, and Sn and 5, 20, 100 µg/kg for Hg and Me-Hg spiked concentrations and are shown as mean ± relative standard deviation (*n*=3).
