# Supplementary material for: Risk Assessment and Determination of Heavy Metals in Home Meal Replacement Products by Using Inductively Coupled Plasma Mass Spectrometry and Direct Mercury Analyzer
Source: Foods. 2022 Feb 10;11(4):504. doi: 10.3390/foods11040504 (PMC8870816; doi:10.3390/foods11040504)
Supplement: Supplementary file 1 [file foods-11-00504-s001.zip › Table S2 (revised).pdf]

**Table S2. The  $\mu(\text{Rec})$ , RSU, CSU, and EU of the heavy metals.**

| Heavy metal element        | $\mu(\text{Rec})$ | RSU   | CSU  | EU                                       |
|----------------------------|-------------------|-------|------|------------------------------------------|
| Pb (mg/kg)                 | 0.167             | 0.168 | 0.17 | $\mu(C_{Pb}) = C_{Pb} \times 0.34$       |
| Cd (mg/kg)                 | 0.093             | 0.093 | 0.10 | $\mu(C_{Cd}) = C_{Cd} \times 0.20$       |
| As (mg/kg)                 | 0.155             | 0.153 | 0.16 | $\mu(C_{As}) = C_{As} \times 0.32$       |
| Sn (mg/kg)                 | 0.321             | 0.320 | 0.33 | $\mu(C_{Sn}) = C_{Sn} \times 0.66$       |
| Hg ( $\mu\text{g/kg}$ )    | 0.082             | 0.084 | 0.08 | $\mu(C_{Hg}) = C_{Hg} \times 0.16$       |
| Me-Hg ( $\mu\text{g/kg}$ ) | 0.198             | 0.204 | 0.20 | $\mu(C_{Me-Hg}) = C_{Me-Hg} \times 0.40$ |
