# Supplementary material for: Risk Assessment and Determination of Heavy Metals in Home Meal Replacement Products by Using Inductively Coupled Plasma Mass Spectrometry and Direct Mercury Analyzer
Source: Foods. 2022 Feb 10;11(4):504. doi: 10.3390/foods11040504 (PMC8870816; doi:10.3390/foods11040504)
Supplement: Supplementary file 1 [file foods-11-00504-s001.zip › Table S3 (revised).pdf]

**Table S3. Total average food intake data and 95<sup>th</sup> percentile food intake data for the six heavy metals in HMR (g/day).**

| Matrix type            | Six heavy metals                       |                                                      |
|------------------------|----------------------------------------|------------------------------------------------------|
|                        | Total average food intake data (g/day) | 95 <sup>th</sup> percentile food intake data (g/day) |
| Non-fatty solid phase  | 0.041                                  | 0.134                                                |
| Fatty solid phase      | 0.018                                  | 0.035                                                |
| Non-fatty liquid phase | 0.030                                  | 0.010                                                |
| Fatty liquid phase     | 0.001                                  | 0.009                                                |
