# Supplementary material for: Risk Assessment and Determination of Heavy Metals in Home Meal Replacement Products by Using Inductively Coupled Plasma Mass Spectrometry and Direct Mercury Analyzer
Source: Foods. 2022 Feb 10;11(4):504. doi: 10.3390/foods11040504 (PMC8870816; doi:10.3390/foods11040504)
Supplement: Supplementary file 1 [file foods-11-00504-s001.zip › Table S4.pdf]

**Table S4.** Average body weights and exposure periods for calculating chronic daily intake in HMR.

| Ages     | Average body weight (kg) | Body weight (kg) | Exposure period (year) |
|----------|--------------------------|------------------|------------------------|
| Above 65 | 58.5                     | 57.9             | 16.5                   |
| 20-64    |                          | 64.4             | 45                     |
| 13-19    |                          | 59.1             | 7                      |
| 7-12     |                          | 37.4             | 6                      |
| 3-6      |                          | 19.5             | 4                      |
| 1-2      |                          | 12.5             | 2                      |
