# Supplementary material for: Risk Assessment and Determination of Heavy Metals in Home Meal Replacement Products by Using Inductively Coupled Plasma Mass Spectrometry and Direct Mercury Analyzer
Source: Foods. 2022 Feb 10;11(4):504. doi: 10.3390/foods11040504 (PMC8870816; doi:10.3390/foods11040504)
Supplement: Supplementary file 1 [file foods-11-00504-s001.zip › Table S5.pdf]

**Table S5. Risk and margin of exposure of six heavy metals in HMR.**

| Matrix type            | Risk and margin of exposure               |                                             |
|------------------------|-------------------------------------------|---------------------------------------------|
|                        | Total average risk and margin of exposure | 95th percentile risk and margin of exposure |
| Non-fatty solid phase  | $9.67 \times 10^6$                        | $2.94 \times 10^6$                          |
| Fatty solid phase      | $2.68 \times 10^7$                        | $1.39 \times 10^7$                          |
| Non-fatty liquid phase | $2.17 \times 10^7$                        | $6.22 \times 10^7$                          |
| Fatty liquid phase     | $5.34 \times 10^8$                        | $5.94 \times 10^7$                          |
